# Supplementary material
Source: publisher site journal article supplement (https://static.cambridge.org/content/id/urn:cambridge.org:id:article:S2632324920000176/resource/name/S2632324920000176supp004.docx)
Supplement: Supplementary file 1 [file S2632324920000176supp004.docx]

Appendix 4. Anti-immigrant campaigns. Values-basis: varied

| Name of the campaign | Support/format | Institution | Country | Link | Brief summary | Values-basis |
| --- | --- | --- | --- | --- | --- | --- |
| Forced settlement endangers our culture and traditions | Brochure | Hungarian Government | Hungary | <https://www.hrw.org/news/2016/09/13/hungarys-xenophobic-anti-migrant-campaign> | The booklet, which the government has sent to 4.1 million Hungarian households, argues people should vote “no” in the October 2 national referendum with respect to the EU relocation plan. | Tradition, conformity, security |
| It's time to shake up Brussels. Let's protect Europe! | Video | Hungarian Government | Hungary | <http://abouthungary.hu/migration/video-its-time-to-shake-up-brussels-lets-protect-europe/> | This campaign video, produced by the Government of Hungary, underlines that Hungary does not want to become an immigrant country. | Tradition, conformity, security |
| #migrationspaktstopen (Stop the migration pact) | Videos, Website, Social Media, Leaflets | Identarian Movement Austria (IBO), Alternative fur Deutschland (AfD) | Germany, Switzerland, Austria | <https://www.afd.de/migrationspakt-stoppen/> | Campaign launched by right-wing activist Martin Seller (IBO) in Austria, then taken up by groups in Switwerland and Germay through a wesite (not accessible anymore) to gather signatures to stop the swiss, german and austrian diplomat to sign the GCM in 2018. The campaign also included social media posts, an intensive and deliberated period of posting on twitter, and a telegram chat. In Germany, the campaign is financed by the right-extreme party AFD. | Tradition, conformity, security |
| Campaign Against the UN Migration Global Comact | Social media | New Flamisch Alliance (N-VA) | Belgium | <https://www.lalibre.be/belgique/politique-belge/la-n-va-lance-une-campagne-aux-relents-extremes-contre-le-pacte-de-l-onu-5c06deeccd70fdc91bca8ba8> | This social media campaign launched y the separatist and right-wing pary N-VA aims at coutenring the Global Compact on Migration. It uses images with strong connation such as women wearing the burqa or groups of brown men with slogans predicting the negative consequences of the global compact | Tradition, conformity, security |
| C'est possible. (It's possible) | Stickers, posters | Génération Identitaire | France | <https://generationidentitaire.org/campagne/> | Fundraising campaign advocating against dangers of massive immigration, islamic radicalisation and insecurity caused by migrant people, as part as anti-migrants actions under the framework of Defend Europe. | Self-transcendence, stimulation, conformity |
| Massive Zuwanderung Stoppen (Stop mass immigration) | Website, Posters, Social Media, Leaflets | Schweizer Demokratischer Partei (SVP) | Switzerland | <https://www.initiative-de-limitation.ch/> | Campaign lauched by SVP, a right-wing polical party, in order to persuade citizens to vote in favour of further limitation of immigration. | Benevolence, power, universalism, security, tradition |
| Unfortunately for her, Sandra is not a migrant | Posters, Social media | Les Jeunes Avec Marine (Front National/ Rassemblement National) | France | <https://rassemblementnational.fr/annonces/migrants-decouvrez-la-nouvelle-campagne-des-jeunes-avec-marine/> | A political campaign aimed at criticizing social services and benefits provided to migrants. It shows people seen from behind, with slogans such as "Sandra has been sleeping in her car for the last three months. Unfortunately for her, Sandra is not a migrant" or "Pierre is a retired farmer and lives with 284 eur per month. Unfortunately for him, Pierre is not a migrant". | Benevolence |
| Massive Zuwanderung Stoppen (Stop mass immigration) | Website, Posters, Social Media, Leaflets | Schweizer Demokratischer Partei (SVP) | Switzerland | <https://www.initiative-de-limitation.ch/> | Campaign lauched by SVP, a right-wing polical party, in order to persuade citizens to vote in favour of further limitation of immigration. | Benevolence, power, universalism, security, tradition |
